# Supplementary material for: Cell-Intrinsic Tumorigenic Functions of PPARγ in Bladder Urothelial Carcinoma
Source: Oxford University Press journal article supplement (doi:10.1158/1541-7786.mcr-20-0189), 2021-01-11
Supplement: 15417786mcr200189-sup-238242_3_supp_6792376_qlgtq9.docx [file 15417786mcr200189-sup-238242_3_supp_6792376_qlgtq9.docx]

**Supplemental Figure S1 – Determination of PPAR expression in UC and subtyping of UC cell lines.**

**Supplemental Figure S1 – Determination of PPAR expression in UC and subtyping of UC cell lines.**

**(A)** Quantitative analysis of PPAR levels in bladder epithelium, NMIBC (n = 20) and MIBC (n = 39) tissue sections present on the Biomax tissue array. **(B)** Western blot analysis showing PPAR expression in primary bladder epithelial cells and multiple UC cell lines. GAPDH is used as loading control. **(C)** mRNA expression analysis showing *PPARG* expression in primary bladder epithelial cells and multiple UC cell lines. **(D)** Expression levels of *PPARG* in various UC cell lines, extracted from RNA-Seq data available on the Cancer Cell Line Encyclopedia. Cell lines used in this report are indicated in green. **(E)** Western blot analysis showing expression levels of the basal markers KRT5 and KRT6, and the luminal marker FOXA1 in several UC cell lines. Data are presented as mean ± SEM. **** (p < 0.0001), ** (p < 0.01), * (p < 0.05). Student’s two-tailed unpaired t-test for pairwise comparisons, and one-way ANOVA for multiple comparisons. Asterisks represent *p* values for comparison between control and used experimental conditions.

**Supplemental Figure S2 – Effect of pharmacological PPAR inhibition on gene expression and cell cycle progression.**

**Supplemental Figure S2 – Effect of pharmacological PPAR inhibition on gene expression and cell cycle progression.**

**Supplemental Figure S2 – Effect of pharmacological PPAR inhibition on gene expression and cell cycle progression.**

**(A)** qPCR for PPAR target genes *PLIN2, SCD,* and *FABP4* following 48 hrs of DMSO or 100 nM T0070907 treatment in 5637 cells. **(B)** Annexin V–PI double-negative population of UC cell lines treated with DMSO or 100 nM T0070907 in long-term culture, determined by flow cytometry. **(C)** Representative flow cytometry plots of PI cell cycle analysis data of control and T0070907 treated 5637 cells displayed in **Fig. 2C**. **(D)** Boyden chamber invasion assay of control and T0070907 treated cells. **(E)** mRNA expression levels of the migration markers *MMP3*, *MMP9*, and *TIMP1* in control and T0070907 treated cells. Data are presented as mean ± SEM. **** (p < 0.0001), ** (p < 0.01), * (p < 0.05). Student’s two-tailed unpaired t-test for pairwise comparisons. Asterisks represent *p* values for comparison between control and used experimental conditions.

**Supplemental Figure S3 – Validation of *PPARG* CRISPR KO and shRNA rescue experiment.**

**Supplemental Figure S3 – Validation of *PPARG* CRISPR KO and shRNA rescue experiment.**

**(A)** Representative flow cytometry plots of PI cell cycle analysis data of control and *PPARG* sgRNA 6 5637 cells. **(B)** Western blot of PPAR levels in 5637 cells following addition of empty vector (control) or *PPARG* shRNA-resistant cDNA (cDNA) and expression of either SCR or *PPARG* shRNA #2 (*PPARG* sh2). GAPDH was used as loading control. **(C)** Growth curve of *PPARG* shRNA rescue experiment in 5637 cells. **(D)** Oil red O staining of NIH-3T3 cells expressing either empty vector or *PPARG* shRNA-resistant cDNA and treated with adipogenic cocktail. Scale bar = 500 μm. **(E)** Boyden chamber invasion assay of control, *PPARG* sgRNA 6 and *PPARG* sgRNA 9 UC cells. **(F)** mRNA expression levels of the migration markers *MMP3*, *MMP9* and *TIMP1* in control, *PPARG* sgRNA 6 and *PPARG* sgRNA 9 UC cells. Data are presented as mean ± SEM. **** (p < 0.0001), *** (p < 0.001), ** (p < 0.01), * (p < 0.05). n.s. = not significant. Student’s two-tailed unpaired t-test for pairwise comparisons, and one-way ANOVA for multiple comparisons. Asterisks represent *p* values for comparison between control and used experimental conditions.

**Supplemental Figure S4 – Validation of ChIP-seq data from the 5637 cell line.**

**Supplemental Figure S4 – Validation of ChIP-seq data from the 5637 cell line.**

**(A)** PPAR, RXR, and IgG enrichment at enhancer sites near *PDK4* and *CPT1A* (*INS*, negative control) in 5637 cells, assayed by ChIP-qPCR. **(B)** ChIP-qPCR for PPAR, RXR, and IgG enrichment at top binding sites identified by ChIP-seq. **(C)** ChIP-seq tracks of PPAR, RXR, IgG and Input, showing PPAR-RXR occupancy ~2 kb upstream of *HS1BP3-IT1*. **(D)** ChIP-seq tracks of PPAR, RXR, IgG and Input, showing PPAR-RXR occupancy at *RXRA* intronic enhancer site.

**Supplemental Figure S5 – PPAR regulates proliferation and migration through SHH in UC.**

**Supplemental Figure S5 – PPAR regulates proliferation and migration through SHH in UC.**

**(A)** *SHH* gene expression following 100 nM Rosiglitazone or T0070907 treatment, relative to DMSO in 5637 cells. **(B)** *SHH* gene expression following T0070907 treatment in 5637, HT-1197 and Cal-29 cells, relative to Ctrl. **(C)** SHH protein levels following control, *SHH* shRNA 4, or *SHH* shRNA treatment. GAPDH was used as loading control. **(D)** *SHH* gene expression following control, *SHH* shRNA 5, or *SHH* 6 shRNA treatment, relative to Ctrl. **(E)** Flow cytometric analysis of EdU incorporation in control, *SHH* shRNA 5, or *SHH* 6 shRNA treated UC cell lines. **(F)** Boyden chamber invasion assay of control, *SHH* shRNA 5, or *SHH* 6 shRNA treated UC cells. **(G)** Flow cytometric analysis of EdU incorporation in control, *SHH* shRNA 5, and/or *PPARG* sgRNA 6 treated UC cells. **(H)** Boyden chamber invasion assay of control, *SHH* shRNA 5, and/or *PPARG* sgRNA 6 treated UC cells. **(I)** mRNA expression analysis of PPAR targets within the KEGG hsa03320: PPAR signaling pathway (*FABP4*, *PLIN2*, *LPL*, *SCD*) in inverse agonist-treated or *PPARG* sgRNA 6-treated cells relative to DMSO treated 5637 cells. Data are presented as mean ± SEM. **** (p < 0.0001), *** (p < 0.001), ** (p < 0.01), * (p < 0.05), n.s. = not significant. Student’s two-tailed unpaired t-test for pairwise comparisons or one-way ANOVA for multiple comparisons. Asterisks represent *p* values for comparison between control and used experimental conditions.
